# Supplementary material for: MBD2 upregulates miR-301a-5p to induce kidney cell apoptosis during vancomycin-induced AKI
Source: PubMed Central journal article supplement (PMC5682674; doi:10.1038/cddis.2017.509), 2017-10-12
Supplement: cddis2017509x1.pdf [file cddis2017509x1.pdf]

# Condition pairs: NV24h vs 24NC  
 # Fold Change cut-off: 2.0

# Column "ID": array ID of the probes, each miRNA always has its unique probe, but some miRNAs may have two different probes.  
 # Column "Name": the name of each miRNA.  
 # Column "Fold change": the ratio of normalized intensities between two conditions (use normalized data, ratio scale).  
 # Column "ForeGround": the foreground intensity of each probe.  
 # Column "ForeGround-BackGround": the signal of the probe after background correction.  
 # Column "Normalized": the normalized ratio of the microRNA. Median Normalization Method was adopted.

### VAN vs control 2.0 fold up regulated miRNAs

| ID     | Name              | Fold change    |         | ForeGround |         | eGround-BackGround |         | Normalized |
|--------|-------------------|----------------|---------|------------|---------|--------------------|---------|------------|
|        |                   | VAN vs control | control | VAN        | control | VAN                | control |            |
| 17928  | hsa-miR-181a-2-3p | 5.10886        | 66.5    | 128.5      | 13      | 58.5               | 0.05634 |            |
| 42795  | kshv-miR-K12-3-5p | 3.45751        | 62.5    | 109        | 11      | 33.5               | 0.04767 |            |
| 146117 | hsv1-miR-H6-3p    | 11.9837        | 56.5    | 117.5      | 4.5     | 47.5               | 0.0195  |            |
| 145678 | hsa-miR-150-5p    | 2.49321        | 77      | 131        | 25.5    | 56                 | 0.11051 |            |
| 168640 | hsa-miR-4475      | 5.29481        | 115     | 339.5      | 58      | 270.5              | 0.25135 |            |
| 168861 | hsa-miR-4754      | 7.83358        | 58.5    | 100.5      | 5       | 34.5               | 0.02167 |            |
| 169170 | hsa-miR-4472      | 4.78022        | 64      | 106        | 9.5     | 40                 | 0.04117 |            |
| 147722 | hsa-miR-4306      | 2.2059         | 148.5   | 254.5      | 96.5    | 187.5              | 0.4182  |            |
| 147595 | hsa-miR-3178      | 3.15296        | 149.5   | 335        | 96.5    | 268                | 0.4182  |            |
| 27565  | hsa-miR-423-5p    | 3.92539        | 215.5   | 639        | 165     | 570.5              | 0.71506 |            |
| 168954 | hsa-miR-5580-5p   | 3.74649        | 69.5    | 133        | 20      | 66                 | 0.08667 |            |
| 147767 | hsa-miR-4279      | 3.382          | 109     | 214.5      | 47.5    | 141.5              | 0.20585 |            |
| 148682 | hsa-miR-483-3p    | 3.77936        | 130.5   | 325.5      | 76      | 253                | 0.32936 |            |
| 169308 | hsa-miR-4503      | 2.20573        | 79      | 108        | 17.5    | 34                 | 0.07584 |            |
| 169282 | hsa-miR-4290      | 3.5406         | 124.5   | 253.5      | 59      | 184                | 0.25569 |            |
| 169034 | hsa-miR-642b-5p   | 3.52108        | 91      | 176        | 34.5    | 107                | 0.14951 |            |
| 27568  | hsa-miR-744-5p    | 3.28709        | 137     | 317        | 86      | 249                | 0.3727  |            |
| 42832  | hsa-miR-638       | 3.82218        | 61.5    | 122.5      | 15      | 50.5               | 0.06501 |            |
| 146090 | hsv1-miR-H7-3p    | 3.96637        | 168.5   | 479.5      | 118.5   | 414                | 0.51354 |            |
| 147938 | hsa-miR-4287      | 12.8667        | 66      | 188.5      | 10.5    | 119                | 0.0455  |            |
| 148687 | hsa-miR-1908-5p   | 3.19424        | 111.5   | 237.5      | 59      | 166                | 0.25569 |            |
| 148234 | hsa-miR-3667-5p   | 2.00347        | 81      | 113        | 25.5    | 45                 | 0.11051 |            |
| 148284 | hsa-miR-208b-3p   | 3.62238        | 167     | 446.5      | 118     | 376.5              | 0.51138 |            |
| 169320 | hsa-miR-4468      | 3.22615        | 117.5   | 237        | 60      | 170.5              | 0.26002 |            |
| 169319 | hsa-miR-3136-3p   | 2.01683        | 91.5    | 144        | 42.5    | 75.5               | 0.18418 |            |
| 42502  | hsa-miR-204-3p    | 6.00989        | 114     | 404.5      | 63      | 333.5              | 0.27302 |            |
| 145633 | hsa-let-7d-3p     | 3.51058        | 120     | 287.5      | 70.5    | 218                | 0.30553 |            |
| 168919 | hsa-miR-4456      | 2.95645        | 248     | 578.5      | 194.5   | 506.5              | 0.8429  |            |
| 168776 | hsa-miR-4795-3p   | 5.90777        | 105     | 355        | 54      | 281                | 0.23402 |            |
| 168998 | hsa-miR-4508      | 9.71313        | 55      | 112        | 4.5     | 38.5               | 0.0195  |            |
| 42782  | hcmv-miR-UL148D   | 2.90637        | 69      | 102        | 12.5    | 32                 | 0.05417 |            |
| 46336  | hsa-miR-1284      | 7.47894        | 107     | 393        | 48.5    | 319.5              | 0.21018 |            |
| 42581  | hsa-miR-513a-5p   | 7.23425        | 76.5    | 205        | 21.5    | 137                | 0.09317 |            |

|        |                   |         |       |       |       |       |         |
|--------|-------------------|---------|-------|-------|-------|-------|---------|
| 146158 | hsa-miR-3202      | 3.36252 | 128.5 | 303   | 78.5  | 232.5 | 0.3402  |
| 169050 | hsa-miR-4787-5p   | 4.20245 | 189.5 | 534   | 124   | 459   | 0.53738 |
| 27537  | ebv-miR-BART13-3p | 2.48347 | 83.5  | 124   | 24    | 52.5  | 0.10401 |
| 168727 | hsa-miR-4426      | 4.37091 | 61.5  | 107   | 10    | 38.5  | 0.04334 |
| 168971 | hsa-miR-4449      | 9.79197 | 63.5  | 174.5 | 12    | 103.5 | 0.052   |
| 169087 | hsa-miR-149-3p    | 5.34012 | 63.5  | 132   | 13.5  | 63.5  | 0.0585  |
| 169138 | hsa-miR-4504      | 2.19554 | 116.5 | 192   | 60.5  | 117   | 0.26219 |
| 42906  | ebv-miR-BHRF1-1   | 3.15078 | 97    | 196   | 44.5  | 123.5 | 0.19285 |
| 146196 | hsa-miR-711       | 7.77334 | 104   | 409.5 | 49    | 335.5 | 0.21235 |
| 148085 | hsa-miR-3687      | 11.5044 | 61    | 150   | 7.5   | 76    | 0.0325  |
| 11037  | hsa-miR-299-3p    | 2.67931 | 78.5  | 132.5 | 25    | 59    | 0.10834 |
| 168765 | hsa-miR-4448      | 4.05465 | 65    | 109   | 10.5  | 37.5  | 0.0455  |
| 168928 | hsa-miR-4431      | 2.40121 | 110   | 191.5 | 56.5  | 119.5 | 0.24485 |
| 169079 | hsa-miR-4667-5p   | 3.61063 | 118.5 | 264.5 | 61    | 194   | 0.26436 |
| 169082 | hsa-miR-1275      | 2.28921 | 147   | 256   | 91.5  | 184.5 | 0.39653 |
| 169399 | hsa-miR-4750-5p   | 3.5836  | 113   | 254.5 | 57.5  | 181.5 | 0.24919 |
| 145768 | hsa-miR-665       | 4.96098 | 112   | 331.5 | 59.5  | 260   | 0.25785 |
| 147604 | hsa-miR-4285      | 5.44945 | 80.5  | 195.5 | 25    | 120   | 0.10834 |
| 147804 | hsv1-miR-H17      | 13.7047 | 64    | 244   | 14    | 169   | 0.06067 |
| 148263 | hsa-miR-1273e     | 5.72381 | 64.5  | 136   | 12    | 60.5  | 0.052   |
| 148216 | hsa-miR-3907      | 2.09515 | 168.5 | 281.5 | 110   | 203   | 0.47671 |
| 168893 | hsa-miR-4505      | 4.26717 | 67    | 128.5 | 14.5  | 54.5  | 0.06284 |
| 169179 | hsa-miR-4650-5p   | 4.85439 | 88.5  | 203   | 29    | 124   | 0.12568 |
| 42929  | hsa-miR-25-5p     | 3.22055 | 78    | 140.5 | 24.5  | 69.5  | 0.10618 |
| 42869  | hsa-miR-936       | 4.00059 | 64    | 107   | 10.5  | 37    | 0.0455  |
| 46258  | hsa-miR-1184      | 3.54079 | 103.5 | 229.5 | 50.5  | 157.5 | 0.21885 |
| 148032 | hsa-miR-3685      | 3.91759 | 88.5  | 189.5 | 35.5  | 122.5 | 0.15385 |
| 17488  | kshv-miR-K12-6-3p | 5.52842 | 81.5  | 185   | 23    | 112   | 0.09967 |
| 169285 | hsa-miR-4467      | 3.18477 | 308   | 773   | 249   | 698.5 | 1.07909 |
| 169379 | hsa-miR-4694-3p   | 7.00103 | 62    | 141.5 | 12    | 74    | 0.052   |
| 169232 | hsa-miR-3156-3p   | 2.85188 | 114   | 226   | 62.5  | 157   | 0.27086 |
| 169395 | hsa-miR-4484      | 2.11018 | 106.5 | 153   | 46    | 85.5  | 0.19935 |
| 146072 | hsa-miR-1469      | 4.16277 | 83    | 173   | 24    | 88    | 0.10401 |
| 147942 | hsa-miR-4268      | 4.46552 | 86.5  | 194   | 30    | 118   | 0.13001 |
| 148622 | hsa-miR-877-3p    | 2.60699 | 70.5  | 112.5 | 13.5  | 31    | 0.0585  |
| 169239 | hsa-miR-4732-5p   | 2.02978 | 89.5  | 163.5 | 33    | 59    | 0.14301 |
| 42514  | hsa-miR-937-3p    | 2.01393 | 345   | 590   | 287.5 | 510   | 1.24594 |
| 147651 | hsa-miR-3123      | 3.06773 | 84    | 142.5 | 23.5  | 63.5  | 0.10184 |
| 169375 | hsa-miR-660-3p    | 4.98101 | 107.5 | 322   | 55.5  | 243.5 | 0.24052 |
| 169380 | hsa-miR-3124-3p   | 2.22203 | 149.5 | 259.5 | 93.5  | 183   | 0.4052  |
| 169189 | hsa-miR-4795-5p   | 4.87233 | 65    | 133   | 12    | 51.5  | 0.052   |
| 147923 | hsa-miR-3142      | 2.59497 | 121   | 212.5 | 63    | 144   | 0.27302 |
| 147631 | hsa-miR-4258      | 6.43337 | 60.5  | 101.5 | 6     | 34    | 0.026   |
| 147930 | hsa-miR-3144-3p   | 2.57808 | 76    | 123.5 | 24    | 54.5  | 0.10401 |
| 148156 | hsa-miR-3686      | 2.38306 | 158.5 | 292   | 106   | 222.5 | 0.45937 |
| 168941 | hsa-miR-4501      | 3.66324 | 91    | 191.5 | 37.5  | 121   | 0.16251 |
| 169116 | hsa-miR-4788      | 7.35843 | 65.5  | 158.5 | 13.5  | 87.5  | 0.0585  |
| 169012 | hsa-miR-4711-3p   | 8.62829 | 65    | 107.5 | 5     | 38    | 0.02167 |
| 42702  | hsa-miR-30c-1-3p  | 7.7003  | 78    | 227.5 | 23    | 156   | 0.09967 |
| 168638 | hsa-miR-4530      | 5.4116  | 88    | 224.5 | 30    | 143   | 0.13001 |
| 169024 | hsa-miR-3960      | 2.16656 | 371   | 674   | 311   | 593.5 | 1.34778 |

|        |                    |         |       |        |       |        |         |
|--------|--------------------|---------|-------|--------|-------|--------|---------|
| 169028 | hsa-miR-4708-3p    | 3.14939 | 177   | 400    | 119.5 | 331.5  | 0.51788 |
| 13137  | hsa-miR-518e-5p/hs | 8.20513 | 73    | 162.5  | 11    | 79.5   | 0.04767 |
| 42458  | hcmv-miR-US25-1-3  | 11.0692 | 70.5  | 145.5  | 6     | 58.5   | 0.026   |
| 148678 | hsa-miR-301a-5p    | 6.54346 | 87    | 236.5  | 27.5  | 158.5  | 0.11918 |
| 147738 | hsv2-miR-H20       | 3.71553 | 93.5  | 190.5  | 33    | 108    | 0.14301 |
| 168935 | hsa-miR-4687-3p    | 6.06677 | 73    | 158.5  | 16    | 85.5   | 0.06934 |
| 168672 | hsa-miR-1587       | 9.1581  | 66.5  | 134.5  | 7.5   | 60.5   | 0.0325  |
| 17492  | sv40-miR-S1-5p     | 3.35957 | 126   | 290    | 73.5  | 217.5  | 0.31853 |
| 42673  | hsa-miR-337-3p     | 82.877  | 76.5  | 1858.5 | 24.5  | 1788.5 | 0.10618 |
| 17668  | hsa-miR-552-3p     | 6.96662 | 65    | 139.5  | 11    | 67.5   | 0.04767 |
| 23767  | hsa-miR-759        | 2.90637 | 67    | 103.5  | 12.5  | 32     | 0.05417 |
| 147790 | hsv2-miR-H7-3p     | 7.77892 | 80.5  | 256    | 27    | 185    | 0.11701 |
| 168978 | hsa-miR-371b-5p    | 3.42407 | 178   | 449    | 125   | 377    | 0.54171 |
| 169228 | hsa-miR-4698       | 4.10601 | 82.5  | 179    | 30    | 108.5  | 0.13001 |
| 169110 | hsa-miR-4497       | 4.71885 | 330.5 | 1225   | 278   | 1155.5 | 1.20477 |
| 42661  | hsa-miR-492        | 6.91502 | 63.5  | 103.5  | 5.5   | 33.5   | 0.02384 |
| 168841 | hsa-miR-5588-3p    | 2.38211 | 114.5 | 187    | 56    | 117.5  | 0.24269 |
| 46731  | hsa-miR-4657       | 2.72715 | 197   | 405    | 140.5 | 337.5  | 0.60888 |
| 169212 | hsa-miR-514a-5p    | 9.36624 | 63.5  | 122.5  | 6     | 49.5   | 0.026   |
| 169313 | hsa-miR-4800-3p    | 5.12317 | 293.5 | 1150.5 | 238   | 1074   | 1.03142 |
| 169388 | hsa-miR-663a       | 12.9141 | 66    | 157    | 8     | 91     | 0.03467 |
| 46408  | hsa-miR-1322       | 42.8009 | 64    | 268.5  | 5     | 188.5  | 0.02167 |
| 168944 | hsa-miR-4707-5p    | 4.66284 | 71.5  | 133.5  | 14    | 57.5   | 0.06067 |
| 168660 | hsa-miR-5000-5p    | 17.8552 | 61.5  | 166.5  | 5.5   | 86.5   | 0.02384 |

### VAN vs control 2.0 fold down regulated miRNAs

| ID     | Name            | Fold change    |         | ForeGround |         | eGround-BackGro |         | Normalized |
|--------|-----------------|----------------|---------|------------|---------|-----------------|---------|------------|
|        |                 | VAN vs control | control | VAN        | control | VAN             | control |            |
| 11052  | hsa-miR-31-5p   | 0.36367        | 363     | 171        | 307.5   | 98.5            | 1.33261 |            |
| 145843 | hsa-miR-330-5p  | 0.21221        | 107     | 78.5       | 53.5    | 10              | 0.23185 |            |
| 42524  | hsa-miR-21-3p   | 0.33596        | 110     | 85.5       | 49      | 14.5            | 0.21235 |            |
| 145641 | hsa-miR-369-5p  | 0.36642        | 147.5   | 98.5       | 94.5    | 30.5            | 0.40953 |            |
| 148327 | hsa-miR-3651    | 0.44724        | 124.5   | 94         | 66      | 26              | 0.28602 |            |
| 169199 | hsa-miR-4518    | 0.38616        | 354.5   | 170.5      | 294     | 100             | 1.27411 |            |
| 42496  | hsa-miR-181c-5p | 0.45987        | 93.5    | 85.5       | 39.5    | 16              | 0.17118 |            |
| 10306  | hsa-miR-146b-5p | 0.47528        | 457.5   | 238        | 402.5   | 168.5           | 1.74431 |            |
| 17882  | hsa-miR-20b-3p  | 0.46893        | 101.5   | 88         | 46      | 19              | 0.19935 |            |
| 10943  | hsa-miR-136-5p  | 0.48216        | 4201    | 1835       | 4146.5  | 1761            | 17.9697 |            |
| 146098 | hsv1-miR-H5-3p  | 0.39132        | 168.5   | 111.5      | 117.5   | 40.5            | 0.50921 |            |
| 146161 | hsa-miR-2115-3p | 0.48807        | 103.5   | 93.5       | 53.5    | 23              | 0.23185 |            |
| 145693 | hsa-miR-92a-3p  | 0.49361        | 154     | 112.5      | 103.5   | 45              | 0.44854 |            |
| 10937  | hsa-miR-132-3p  | 0.44583        | 159.5   | 113.5      | 109.5   | 43              | 0.47454 |            |
| 46944  | hsa-miR-1297    | 0.4961         | 109.5   | 96         | 59.5    | 26              | 0.25785 |            |
| 145643 | hsa-miR-382-5p  | 0.40409        | 198     | 127.5      | 147.5   | 52.5            | 0.63922 |            |
| 169159 | hsa-miR-4521    | 0.44325        | 250     | 146        | 198.5   | 77.5            | 0.86024 |            |
| 19585  | hsa-miR-148b-3p | 0.40137        | 107.5   | 86.5       | 49.5    | 17.5            | 0.21452 |            |
| 145844 | hsa-miR-374a-5p | 0.34754        | 112.5   | 88.5       | 49      | 15              | 0.21235 |            |
| 145859 | hsa-miR-33a-5p  | 0.47519        | 772.5   | 369.5      | 706     | 295.5           | 3.05959 |            |
| 31867  | hsa-miR-145-3p  | 0.33962        | 111     | 87.5       | 58.5    | 17.5            | 0.25352 |            |
| 145634 | hsa-miR-132-5p  | 0.13723        | 100.5   | 79         | 45.5    | 5.5             | 0.19718 |            |

|        |                    |         |        |       |        |       |         |
|--------|--------------------|---------|--------|-------|--------|-------|---------|
| 46320  | hsa-miR-31-3p      | 0.14995 | 106.5  | 79.5  | 53     | 7     | 0.22969 |
| 10925  | hsa-miR-10b-5p     | 0.3211  | 104    | 85    | 49.5   | 14    | 0.21452 |
| 42839  | hsa-miR-135a-5p    | 0.4953  | 643    | 328.5 | 584.5  | 255   | 2.53304 |
| 46737  | hsa-miR-1265       | 0.46444 | 86.5   | 88.5  | 33     | 13.5  | 0.14301 |
| 13140  | hsa-miR-138-5p     | 0.36611 | 529.5  | 226.5 | 476    | 153.5 | 2.06284 |
| 11013  | hsa-miR-181a-3p    | 0.45138 | 96     | 90.5  | 41.5   | 16.5  | 0.17985 |
| 29802  | hsa-miR-144-3p     | 0.49242 | 134    | 113.5 | 83     | 36    | 0.3597  |
| 145749 | hsa-miR-137        | 0.36973 | 191    | 121.5 | 130.5  | 42.5  | 0.56555 |
| 145746 | hsa-let-7i-3p      | 0.20787 | 90.5   | 78.5  | 35.5   | 6.5   | 0.15385 |
| 10986  | hsa-miR-193a-3p    | 0.47502 | 182    | 119.5 | 119.5  | 50    | 0.51788 |
| 42451  | hsa-miR-139-3p     | 0.21209 | 99.5   | 78    | 45.5   | 8.5   | 0.19718 |
| 147997 | hsa-miR-3934-5p    | 0.28383 | 112    | 87.5  | 54     | 13.5  | 0.23402 |
| 148559 | hsa-miR-411-3p     | 0.35913 | 101.5  | 88.5  | 49     | 15.5  | 0.21235 |
| 46215  | hsa-miR-1301-3p    | 0.44647 | 102    | 100   | 44.5   | 17.5  | 0.19285 |
| 42950  | hsa-miR-24-2-5p    | 0.35061 | 87     | 83    | 34     | 10.5  | 0.14735 |
| 11053  | hsa-miR-32-5p      | 0.48871 | 131.5  | 106   | 75.5   | 32.5  | 0.32719 |
| 42599  | hsa-miR-153-3p     | 0.44844 | 457    | 245.5 | 400    | 158   | 1.73348 |
| 148645 | hsa-miR-129-5p     | 0.39661 | 170.5  | 141   | 114.5  | 40    | 0.49621 |
| 168887 | hsa-miR-5089-5p    | 0.35017 | 1250.5 | 504.5 | 1191.5 | 367.5 | 5.1636  |
| 169271 | hsa-miR-4784       | 0.26246 | 152    | 161.5 | 93     | 21.5  | 0.40303 |
| 28950  | hsa-miR-455-3p     | 0.35927 | 98.5   | 90.5  | 39.5   | 12.5  | 0.17118 |
| 27544  | hsa-miR-363-5p     | 0.25015 | 119    | 87    | 59     | 13    | 0.25569 |
| 147771 | hsa-miR-4328       | 0.06342 | 142.5  | 75    | 89.5   | 5     | 0.38787 |
| 13147  | hsa-miR-96-5p      | 0.18639 | 88.5   | 96    | 33.5   | 5.5   | 0.14518 |
| 29490  | hsa-miR-7-5p       | 0.35317 | 454    | 227   | 397    | 123.5 | 1.72048 |
| 17280  | hsa-miR-15b-5p     | 0.39736 | 225.5  | 142   | 170    | 59.5  | 0.73673 |
| 42887  | hsa-miR-331-3p     | 0.34779 | 196.5  | 136   | 142    | 43.5  | 0.61538 |
| 168871 | hsa-miR-151a-5p/hs | 0.41448 | 120    | 98    | 63     | 23    | 0.27302 |
| 168980 | hsa-miR-4324       | 0.48296 | 303    | 177   | 248    | 105.5 | 1.07476 |
| 42866  | hsa-miR-451a       | 0.40891 | 398.5  | 204   | 341.5  | 123   | 1.47996 |
| 13171  | hsa-miR-429        | 0.35779 | 141.5  | 110   | 82.5   | 26    | 0.35753 |
| 42532  | hsa-miR-22-5p      | 0.46161 | 108.5  | 100.5 | 45.5   | 18.5  | 0.19718 |
| 148418 | hsa-miR-3607-5p    | 0.3469  | 99     | 92    | 36     | 11    | 0.15601 |
| 168864 | hsa-miR-320d       | 0.47009 | 124.5  | 108.5 | 64     | 26.5  | 0.27736 |
| 17917  | hsa-miR-873-5p     | 0.36762 | 107.5  | 85    | 52.5   | 17    | 0.22752 |
| 17888  | hsa-let-7a-3p      | 0.42823 | 116.5  | 90    | 57     | 21.5  | 0.24702 |
| 17377  | hsa-miR-600        | 0.41134 | 92     | 77.5  | 34.5   | 12.5  | 0.14951 |
| 42739  | hsa-miR-339-5p     | 0.27615 | 92.5   | 79    | 37     | 9     | 0.16035 |
| 13177  | hsa-miR-143-3p     | 0.19536 | 781.5  | 194   | 723.5  | 124.5 | 3.13543 |
| 11078  | hsa-miR-365a-3p/hs | 0.34101 | 197.5  | 126   | 136.5  | 41    | 0.59155 |
| 10987  | hsa-miR-193b-3p    | 0.42574 | 102    | 98.5  | 40     | 15    | 0.17335 |
| 146049 | hsa-miR-28-5p      | 0.4325  | 129    | 95    | 73.5   | 28    | 0.31853 |
| 168925 | hsa-miR-1273g-3p   | 0.43592 | 412.5  | 204.5 | 355.5  | 136.5 | 1.54063 |
