# Supplementary material for: MBD2 upregulates miR-301a-5p to induce kidney cell apoptosis during vancomycin-induced AKI
Source: PubMed Central journal article supplement (PMC5682674; doi:10.1038/cddis.2017.509), 2017-10-12
Supplement: cddis2017509x2.pdf [file cddis2017509x2.pdf]

# Condition pairs: MBD2 siRNA with VAN vs Control# Fold Change cut-off: 2.0

# Column "ID": array ID of the probes, each miRNA always has its unique probe, but some miRNAs may have two different probes.

# Column "Name": the name of each miRNA.

# Column "Fold change": the ratio of normalized intensities between two conditions (use normalized data, ratio scale).

# Column "ForeGround": the foreground intensity of each probe.

# Column "ForeGround-BackGround": the signal of the probe after background correction.

# Column "Normalized": the normalized ratio of the microRNA. Median Normalization Method was adopted.

NOTE: The low intensity differentially expressed miRNAs are filtered in the following list (miRNAs that ForeGround-BackGround intensities < 30 in two samples are filtered). If you

### MBD2 siRNA with VAN vs Control 2.0 fold up regulated miRNAs

| ID     | Name              | Fold change                    | ForeGround | eGround-BackGround  | Normalized |                     |         |                     |
|--------|-------------------|--------------------------------|------------|---------------------|------------|---------------------|---------|---------------------|
| ID     | Name              | MBD2 siRNA with VAN vs Control | control    | MBD2 siRNA with VAN | control    | MBD2 siRNA with VAN | control | MBD2 siRNA with VAN |
| 17928  | hsa-miR-181a-2-3p | 5.54823                        | 66.5       | 124.5               | 13         | 64                  | 0.1     | 0.31258             |
| 42696  | hsa-miR-943       | 9.74036                        | 61.5       | 129                 | 7          | 60.5                | 0       | 0.29548             |
| 42795  | kshv-miR-K12-3-5p | 4.20058                        | 62.5       | 107.5               | 11         | 41                  | 0       | 0.20024             |
| 146117 | hsv1-miR-H6-3p    | 11.2698                        | 56.5       | 107.5               | 4.5        | 45                  | 0       | 0.21978             |
| 145838 | hsa-miR-125b-1-3p | 4.2575                         | 69.5       | 102.5               | 9          | 34                  | 0       | 0.16606             |
| 145678 | hsa-miR-150-5p    | 3.20417                        | 77         | 141.5               | 25.5       | 72.5                | 0.1     | 0.35409             |
| 147165 | hsa-let-7b-5p     | 2.06643                        | 695        | 1240                | 640        | 1173.5              | 2.8     | 5.73138             |
| 168640 | hsa-miR-4475      | 4.93541                        | 115        | 320                 | 58         | 254                 | 0.3     | 1.24054             |
| 169170 | hsa-miR-4472      | 4.62657                        | 64         | 104                 | 9.5        | 39                  | 0       | 0.19048             |
| 169043 | hsa-miR-4462      | 6.64921                        | 60.5       | 121.5               | 10         | 59                  | 0       | 0.28816             |
| 169358 | hsa-miR-4417      | 4.50794                        | 59.5       | 91.5                | 7.5        | 30                  | 0       | 0.14652             |
| 147595 | hsa-miR-3178      | 3.81306                        | 149.5      | 394                 | 96.5       | 326.5               | 0.4     | 1.59463             |
| 27565  | hsa-miR-423-5p    | 3.57903                        | 215.5      | 590                 | 165        | 524                 | 0.7     | 2.55922             |
| 147767 | hsa-miR-4279      | 3.59449                        | 109        | 217                 | 47.5       | 151.5               | 0.2     | 0.73993             |
| 148682 | hsa-miR-483-3p    | 3.03248                        | 130.5      | 272.5               | 76         | 204.5               | 0.3     | 0.99878             |
| 169282 | hsa-miR-4290      | 3.52421                        | 124.5      | 248.5               | 59         | 184.5               | 0.3     | 0.9011              |
| 169034 | hsa-miR-642b-5p   | 3.85461                        | 91         | 182.5               | 34.5       | 118                 | 0.1     | 0.57631             |
| 27568  | hsa-miR-744-5p    | 3.30888                        | 137        | 316                 | 86         | 252.5               | 0.4     | 1.23321             |
| 42832  | hsa-miR-638       | 4.7709                         | 61.5       | 128                 | 15         | 63.5                | 0.1     | 0.31013             |
| 146090 | hsv1-miR-H7-3p    | 3.06235                        | 168.5      | 391.5               | 118.5      | 322                 | 0.5     | 1.57265             |
| 147938 | hsa-miR-4287      | 5.47392                        | 66         | 122                 | 10.5       | 51                  | 0       | 0.24908             |
| 148687 | hsa-miR-1908-5p   | 3.77253                        | 111.5      | 262.5               | 59         | 197.5               | 0.3     | 0.96459             |
| 168572 | hsa-miR-4507      | 5.63492                        | 64         | 102                 | 7          | 35                  | 0       | 0.17094             |
| 169320 | hsa-miR-4468      | 2.93016                        | 117.5      | 226                 | 60         | 156                 | 0.3     | 0.7619              |
| 169319 | hsa-miR-3136-3p   | 2.47937                        | 91.5       | 157.5               | 42.5       | 93.5                | 0.2     | 0.45665             |
| 42502  | hsa-miR-204-3p    | 5.12509                        | 114        | 354                 | 63         | 286.5               | 0.3     | 1.39927             |
| 46789  | hsa-miR-513b-5p   | 2.67137                        | 64         | 103                 | 13.5       | 32                  | 0.1     | 0.15629             |
| 168919 | hsa-miR-4456      | 3.65328                        | 248        | 696.5               | 194.5      | 630.5               | 0.8     | 3.07937             |
| 168661 | hsa-miR-4531      | 6.38624                        | 58.5       | 101                 | 6          | 34                  | 0       | 0.16606             |
| 168776 | hsa-miR-4795-3p   | 6.36537                        | 105        | 371                 | 54         | 305                 | 0.2     | 1.48962             |

|        |                    |         |       |       |       |       |     |         |
|--------|--------------------|---------|-------|-------|-------|-------|-----|---------|
| 168998 | hsa-miR-4508       | 13.2734 | 55    | 120.5 | 4.5   | 53    | 0   | 0.25885 |
| 42782  | hcmv-miR-UL148D    | 3.11048 | 69    | 102   | 12.5  | 34.5  | 0.1 | 0.1685  |
| 46336  | hsa-miR-1284       | 7.2034  | 107   | 374.5 | 48.5  | 310   | 0.2 | 1.51404 |
| 42581  | hsa-miR-513a-5p    | 6.86674 | 76.5  | 197   | 21.5  | 131   | 0.1 | 0.6398  |
| 168843 | hsa-miR-5694       | 4.01206 | 69.5  | 113   | 12.5  | 44.5  | 0.1 | 0.21734 |
| 168995 | hsa-miR-4791       | 2.13811 | 164.5 | 276.5 | 107   | 203   | 0.5 | 0.99145 |
| 169050 | hsa-miR-4787-5p    | 6.82098 | 189.5 | 831   | 124   | 750.5 | 0.5 | 3.66545 |
| 146165 | hsa-miR-1973       | 2.14127 | 83    | 106.5 | 20    | 38    | 0.1 | 0.18559 |
| 168727 | hsa-miR-4426       | 3.94444 | 61.5  | 105.5 | 10    | 35    | 0   | 0.17094 |
| 168971 | hsa-miR-4449       | 6.38624 | 63.5  | 132   | 12    | 68    | 0.1 | 0.33211 |
| 169087 | hsa-miR-149-3p     | 4.59142 | 63.5  | 119.5 | 13.5  | 55    | 0.1 | 0.26862 |
| 146196 | hsa-miR-711        | 4.92193 | 104   | 282.5 | 49    | 214   | 0.2 | 1.04518 |
| 148085 | hsa-miR-3687       | 18.7831 | 61    | 189   | 7.5   | 125   | 0   | 0.6105  |
| 168765 | hsa-miR-4448       | 5.68859 | 65    | 119.5 | 10.5  | 53    | 0   | 0.25885 |
| 168928 | hsa-miR-4431       | 2.04453 | 110   | 167   | 56.5  | 102.5 | 0.2 | 0.50061 |
| 169079 | hsa-miR-4667-5p    | 2.79899 | 118.5 | 215.5 | 61    | 151.5 | 0.3 | 0.73993 |
| 169399 | hsa-miR-4750-5p    | 4.08654 | 113   | 273   | 57.5  | 208.5 | 0.2 | 1.01832 |
| 145768 | hsa-miR-665        | 3.38095 | 112   | 246.5 | 59.5  | 178.5 | 0.3 | 0.87179 |
| 147604 | hsa-miR-4285       | 4.71079 | 80.5  | 173   | 25    | 104.5 | 0.1 | 0.51038 |
| 147804 | hsv1-miR-H17       | 10.5856 | 64    | 203   | 14    | 131.5 | 0.1 | 0.64225 |
| 148263 | hsa-miR-1273e      | 4.8836  | 64.5  | 118   | 12    | 52    | 0.1 | 0.25397 |
| 168893 | hsa-miR-4505       | 4.93541 | 67    | 135.5 | 14.5  | 63.5  | 0.1 | 0.31013 |
| 169179 | hsa-miR-4650-5p    | 3.94444 | 88.5  | 174.5 | 29    | 101.5 | 0.1 | 0.49573 |
| 42929  | hsa-miR-25-5p      | 2.46097 | 78    | 118.5 | 24.5  | 53.5  | 0.1 | 0.26129 |
| 148032 | hsa-miR-3685       | 2.01587 | 88.5  | 128.5 | 35.5  | 63.5  | 0.2 | 0.31013 |
| 17488  | kshv-miR-K12-6-3p  | 7.1539  | 81.5  | 212.5 | 23    | 146   | 0.1 | 0.71306 |
| 168921 | hsa-miR-4718       | 6.41514 | 62.5  | 99    | 6.5   | 37    | 0   | 0.18071 |
| 169285 | hsa-miR-4467       | 2.90572 | 308   | 703   | 249   | 642   | 1.1 | 3.13553 |
| 169379 | hsa-miR-4694-3p    | 3.9914  | 62    | 109   | 12    | 42.5  | 0.1 | 0.20757 |
| 169232 | hsa-miR-3156-3p    | 2.07365 | 114   | 177.5 | 62.5  | 115   | 0.3 | 0.56166 |
| 169395 | hsa-miR-4484       | 2.03347 | 106.5 | 147   | 46    | 83    | 0.2 | 0.40537 |
| 146072 | hsa-miR-1469       | 5.14187 | 83    | 180.5 | 24    | 109.5 | 0.1 | 0.5348  |
| 147942 | hsa-miR-4268       | 6.14206 | 86.5  | 230.5 | 30    | 163.5 | 0.1 | 0.79853 |
| 148622 | hsa-miR-877-3p     | 4.09053 | 70.5  | 114.5 | 13.5  | 49    | 0.1 | 0.23932 |
| 169375 | hsa-miR-660-3p     | 3.92921 | 107.5 | 258.5 | 55.5  | 193.5 | 0.2 | 0.94505 |
| 169189 | hsa-miR-4795-5p    | 3.28704 | 65    | 106.5 | 12    | 35    | 0.1 | 0.17094 |
| 147631 | hsa-miR-4258       | 6.1045  | 60.5  | 94.5  | 6     | 32.5  | 0   | 0.15873 |
| 148156 | hsa-miR-3686       | 2.67925 | 158.5 | 315.5 | 106   | 252   | 0.5 | 1.23077 |
| 168941 | hsa-miR-4501       | 2.77989 | 91    | 153.5 | 37.5  | 92.5  | 0.2 | 0.45177 |
| 169116 | hsa-miR-4788       | 4.38272 | 65.5  | 115.5 | 13.5  | 52.5  | 0.1 | 0.25641 |
| 42702  | hsa-miR-30c-1-3p   | 3.87095 | 78    | 142.5 | 23    | 79    | 0.1 | 0.38584 |
| 168638 | hsa-miR-4530       | 7.34418 | 88    | 258.5 | 30    | 195.5 | 0.1 | 0.95482 |
| 169024 | hsa-miR-3960       | 3.2052  | 371   | 949.5 | 311   | 884.5 | 1.3 | 4.3199  |
| 169028 | hsa-miR-4708-3p    | 4.14485 | 177   | 504   | 119.5 | 439.5 | 0.5 | 2.14652 |
| 13137  | hsa-miR-518e-5p/hs | 4.71284 | 73    | 114   | 11    | 46    | 0   | 0.22466 |
| 42458  | hcmv-miR-US25-1-3  | 9.48545 | 70.5  | 125   | 6     | 50.5  | 0   | 0.24664 |
| 148678 | hsa-miR-301a-5p    | 2.49986 | 87    | 127   | 27.5  | 61    | 0.1 | 0.29792 |
| 147738 | hsv2-miR-H20       | 2.56133 | 93.5  | 145.5 | 33    | 75    | 0.1 | 0.3663  |
| 168935 | hsa-miR-4687-3p    | 4.22619 | 73    | 125.5 | 16    | 60    | 0.1 | 0.29304 |
| 168672 | hsa-miR-1587       | 12.1714 | 66.5  | 149   | 7.5   | 81    | 0   | 0.3956  |
| 17668  | hsa-miR-552-3p     | 7.3254  | 65    | 131.5 | 11    | 71.5  | 0   | 0.34921 |

|        |                 |         |       |        |     |        |     |         |
|--------|-----------------|---------|-------|--------|-----|--------|-----|---------|
| 147790 | hsv2-miR-H7-3p  | 4.50794 | 80.5  | 169    | 27  | 108    | 0.1 | 0.52747 |
| 168978 | hsa-miR-371b-5p | 3.26375 | 178   | 418    | 125 | 362    | 0.5 | 1.76801 |
| 169228 | hsa-miR-4698    | 2.3291  | 82.5  | 122    | 30  | 62     | 0.1 | 0.30281 |
| 169110 | hsa-miR-4497    | 4.81806 | 330.5 | 1247.5 | 278 | 1188.5 | 1.2 | 5.80464 |
| 169313 | hsa-miR-4800-3p | 5.95692 | 293.5 | 1322   | 238 | 1258   | 1   | 6.14408 |
| 169155 | hsa-miR-4480    | 2.39484 | 73    | 97     | 16  | 34     | 0.1 | 0.16606 |
| 169388 | hsa-miR-663a    | 7.67758 | 66    | 116.5  | 8   | 54.5   | 0   | 0.26618 |
| 147667 | hsa-miR-3182    | 2.96772 | 71.5  | 110    | 15  | 39.5   | 0.1 | 0.19292 |
| 168944 | hsa-miR-4707-5p | 4.30669 | 71.5  | 118.5  | 14  | 53.5   | 0.1 | 0.26129 |
| 168660 | hsa-miR-5000-5p | 11.2698 | 61.5  | 120.5  | 5.5 | 55     | 0   | 0.26862 |

### MBD2 siRNA with VAN vs Control 2.0 fold down regulated miRNAs

|        |                 | Fold change                    | ForeGround | Background          | BackGround | Normalized          |         |                     |
|--------|-----------------|--------------------------------|------------|---------------------|------------|---------------------|---------|---------------------|
| ID     | Name            | MBD2 siRNA with VAN vs Control | control    | MBD2 siRNA with VAN | control    | MBD2 siRNA with VAN | control | MBD2 siRNA with VAN |
| 145693 | hsa-miR-92a-3p  | 0.41922                        | 154        | 107                 | 103.5      | 38.5                | 0.4     | 0.18803             |
| 145643 | hsa-miR-382-5p  | 0.4699                         | 198        | 133                 | 147.5      | 61.5                | 0.6     | 0.30037             |
| 145844 | hsa-miR-374a-5p | 0.1955                         | 112.5      | 84.5                | 49         | 8.5                 | 0.2     | 0.04151             |
| 145634 | hsa-miR-132-5p  | 0.37153                        | 100.5      | 81.5                | 45.5       | 15                  | 0.2     | 0.07326             |
| 46320  | hsa-miR-31-3p   | 0.27643                        | 106.5      | 81.5                | 53         | 13                  | 0.2     | 0.06349             |
| 10925  | hsa-miR-10b-5p  | 0.35289                        | 104        | 78.5                | 49.5       | 15.5                | 0.2     | 0.0757              |
| 13140  | hsa-miR-138-5p  | 0.40841                        | 529.5      | 243.5               | 476        | 172.5               | 2.1     | 0.84249             |
| 145746 | hsa-let-7i-3p   | 0.42857                        | 90.5       | 81.5                | 35.5       | 13.5                | 0.2     | 0.06593             |
| 11005  | hsa-miR-204-5p  | 0.38957                        | 92         | 79.5                | 40.5       | 14                  | 0.2     | 0.06838             |
| 42451  | hsa-miR-139-3p  | 0.19815                        | 99.5       | 72                  | 45.5       | 8                   | 0.2     | 0.03907             |
| 147997 | hsa-miR-3934-5p | 0.32349                        | 112        | 81                  | 54         | 15.5                | 0.2     | 0.0757              |
| 148559 | hsa-miR-411-3p  | 0.35649                        | 101.5      | 81                  | 49         | 15.5                | 0.2     | 0.0757              |
| 28950  | hsa-miR-455-3p  | 0.31384                        | 98.5       | 81.5                | 39.5       | 11                  | 0.2     | 0.05372             |
| 27544  | hsa-miR-363-5p  | 0.48709                        | 119        | 93.5                | 59         | 25.5                | 0.3     | 0.12454             |
| 147771 | hsa-miR-4328    | 0.20147                        | 142.5      | 77                  | 89.5       | 16                  | 0.4     | 0.07814             |
| 168915 | hsa-miR-4780    | 0.47584                        | 127.5      | 93                  | 67.5       | 28.5                | 0.3     | 0.13919             |
| 13147  | hsa-miR-96-5p   | 0.47098                        | 88.5       | 78.5                | 33.5       | 14                  | 0.1     | 0.06838             |
| 46918  | hsa-miR-375     | 0.13744                        | 95.5       | 67                  | 41         | 5                   | 0.2     | 0.02442             |
| 29490  | hsa-miR-7-5p    | 0.43149                        | 454        | 216.5               | 397        | 152                 | 1.7     | 0.74237             |
| 13171  | hsa-miR-429     | 0.36883                        | 141.5      | 98                  | 82.5       | 27                  | 0.4     | 0.13187             |
| 42532  | hsa-miR-22-5p   | 0.34676                        | 108.5      | 86                  | 45.5       | 14                  | 0.2     | 0.06838             |
| 10952  | hsa-miR-146a-5p | 0.3734                         | 391.5      | 172.5               | 332        | 110                 | 1.4     | 0.53724             |
| 13177  | hsa-miR-143-3p  | 0.23755                        | 781.5      | 219.5               | 723.5      | 152.5               | 3.1     | 0.74481             |
| 145640 | hsa-miR-328-3p  | 0.01708                        | 90         | 63                  | 33         | 0.5                 | 0.1     | 0.00244             |
| 13133  | hsa-miR-520a-5p | 0.40833                        | 91         | 85                  | 34.5       | 12.5                | 0.1     | 0.06105             |
| 46801  | hsa-miR-106a-5p | 0.49705                        | 287.5      | 172.5               | 229        | 101                 | 1       | 0.49328             |
| 10987  | hsa-miR-193b-3p | 0.45079                        | 102        | 87                  | 40         | 16                  | 0.2     | 0.07814             |
| 146049 | hsa-miR-28-5p   | 0.253                          | 129        | 79.5                | 73.5       | 16.5                | 0.3     | 0.08059             |
