# Supplementary material for: MBD2 upregulates miR-301a-5p to induce kidney cell apoptosis during vancomycin-induced AKI
Source: PubMed Central journal article supplement (PMC5682674; doi:10.1038/cddis.2017.509), 2017-10-12
Supplement: cddis2017509x3.pdf [file cddis2017509x3.pdf]

# Condition pairs: MBD2 siRNA with VAN vs VAN  
 # Fold Change cut-off: 2.0

# Column "ID": array ID of the probes, each miRNA always has its unique probe, but some miRNAs may have two different probes.

# Column "Name": the name of each miRNA.

# Column "Fold change": the ratio of normalized intensities between two conditions (use normalized data, ratio scale).

# Column "ForeGround": the foreground intensity of each probe.

# Column "ForeGround-BackGround": the signal of the probe after background correction.

# Column "Normalized": the normalized ratio of the microRNA. Median Normalization Method was adopted.

NOTE: The low intensity differentially expressed miRNAs are filtered in the following list

### MBD2 siRNA with VAN vs VAN 2.0 fold up regulated miRNAs

| ID     | Name             | Fold change           |       | ForeGround          | eGround-BackGroi | Normalized          |       |                     |
|--------|------------------|-----------------------|-------|---------------------|------------------|---------------------|-------|---------------------|
|        |                  | siRNA with VAN vs VAN | VAN   | MBD2 siRNA with VAN | VAN              | MBD2 siRNA with VAN | VAN   | MBD2 siRNA with VAN |
| 42696  | hsa-miR-943      | 2.4513                | 96    | 129                 | 24.5             | 60.5                | 0.121 | 0.29548             |
| 169043 | hsa-miR-4462     | 3.16583               | 85    | 121.5               | 18.5             | 59                  | 0.091 | 0.28816             |
| 169358 | hsa-miR-4417     | 4.25432               | 75.5  | 91.5                | 7                | 30                  | 0.034 | 0.14652             |
| 145641 | hsa-miR-369-5p   | 2.18063               | 98.5  | 136                 | 30.5             | 67                  | 0.15  | 0.32723             |
| 169199 | hsa-miR-4518     | 2.32782               | 170.5 | 300                 | 100              | 234.5               | 0.492 | 1.1453              |
| 42496  | hsa-miR-181c-5p  | 2.07841               | 85.5  | 99                  | 16               | 33.5                | 0.079 | 0.16361             |
| 17882  | hsa-miR-20b-3p   | 2.01147               | 88    | 104.5               | 19               | 38.5                | 0.093 | 0.18803             |
| 169159 | hsa-miR-4521     | 2.0686                | 146   | 228                 | 77.5             | 161.5               | 0.381 | 0.78877             |
| 19585  | hsa-miR-148b-3p  | 2.49587               | 86.5  | 114                 | 17.5             | 44                  | 0.086 | 0.2149              |
| 168843 | hsa-miR-5694     | 3.53392               | 86.5  | 113                 | 12.5             | 44.5                | 0.062 | 0.21734             |
| 168995 | hsa-miR-4791     | 2.03548               | 173   | 276.5               | 99               | 203                 | 0.487 | 0.99145             |
| 31867  | hsa-miR-145-3p   | 3.17656               | 87.5  | 122                 | 17.5             | 56                  | 0.086 | 0.2735              |
| 42542  | hsa-miR-589-5p   | 2.34886               | 254   | 493                 | 177.5            | 420                 | 0.873 | 2.05128             |
| 168887 | hsa-miR-5089-5p  | 2.74032               | 504.5 | 1081                | 367.5            | 1014.5              | 1.808 | 4.95482             |
| 169271 | hsa-miR-4784     | 4.47858               | 161.5 | 164.5               | 21.5             | 97                  | 0.106 | 0.47375             |
| 168925 | hsa-miR-1273g-3p | 2.02535               | 204.5 | 348                 | 136.5            | 278.5               | 0.672 | 1.3602              |

### MBD2 siRNA with VAN vs VAN 2.0 fold down regulated miRNAs

| ID     | Name              | Fold change           |       | ForeGround          | eGround-BackGroi | Normalized          |       |                     |
|--------|-------------------|-----------------------|-------|---------------------|------------------|---------------------|-------|---------------------|
|        |                   | siRNA with VAN vs VAN | VAN   | MBD2 siRNA with VAN | VAN              | MBD2 siRNA with VAN | VAN   | MBD2 siRNA with VAN |
| 168861 | hsa-miR-4754      | 0.30212               | 100.5 | 76                  | 34.5             | 10.5                | 0.17  | 0.05128             |
| 168954 | hsa-miR-5580-5p   | 0.45874               | 133   | 96.5                | 66               | 30.5                | 0.325 | 0.14896             |
| 147938 | hsa-miR-4287      | 0.42543               | 188.5 | 122                 | 119              | 51                  | 0.585 | 0.24908             |
| 148284 | hsa-miR-208b-3p   | 0.35989               | 446.5 | 201                 | 376.5            | 136.5               | 1.852 | 0.66667             |
| 146158 | hsa-miR-3202      | 0.40561               | 303   | 163.5               | 232.5            | 95                  | 1.144 | 0.46398             |
| 17529  | hcmv-miR-US25-2-3 | 0.4467                | 101   | 75.5                | 30               | 13.5                | 0.148 | 0.06593             |
| 42869  | hsa-miR-936       | 0.12073               | 107   | 69                  | 37               | 4.5                 | 0.182 | 0.02198             |
| 169181 | hsa-miR-5191      | 0.06812               | 117   | 65                  | 51               | 3.5                 | 0.251 | 0.01709             |

|        |                  |         |        |       |        |      |       |         |
|--------|------------------|---------|--------|-------|--------|------|-------|---------|
| 147651 | hsa-miR-3123     | 0.42208 | 142.5  | 96    | 63.5   | 27   | 0.312 | 0.13187 |
| 147930 | hsa-miR-3144-3p  | 0.42803 | 123.5  | 84    | 54.5   | 23.5 | 0.268 | 0.11477 |
| 169012 | hsa-miR-4711-3p  | 0.35266 | 107.5  | 78.5  | 38     | 13.5 | 0.187 | 0.06593 |
| 169137 | hsa-miR-4524b-5p | 0.37685 | 139.5  | 84.5  | 54     | 20.5 | 0.266 | 0.10012 |
| 148678 | hsa-miR-301a-5p  | 0.38204 | 236.5  | 127   | 158.5  | 61   | 0.78  | 0.29792 |
| 168586 | hsa-miR-34a-5p   | 0.37669 | 285    | 147   | 209.5  | 79.5 | 1.031 | 0.38828 |
| 42673  | hsa-miR-337-3p   | 0.01249 | 1858.5 | 82.5  | 1788.5 | 22.5 | 8.8   | 0.10989 |
| 23767  | hsa-miR-759      | 0.07755 | 103.5  | 65    | 32     | 2.5  | 0.157 | 0.01221 |
| 42661  | hsa-miR-492      | 0.23706 | 103.5  | 74    | 33.5   | 8    | 0.165 | 0.03907 |
| 168841 | hsa-miR-5588-3p  | 0.43086 | 187    | 116   | 117.5  | 51   | 0.578 | 0.24908 |
| 46731  | hsa-miR-4657     | 0.48531 | 405    | 227.5 | 337.5  | 165  | 1.661 | 0.80586 |
| 169212 | hsa-miR-514a-5p  | 0.31084 | 122.5  | 82    | 49.5   | 15.5 | 0.244 | 0.0757  |
| 46408  | hsa-miR-1322     | 0.06056 | 268.5  | 83    | 188.5  | 11.5 | 0.927 | 0.05617 |
